# Supplementary material
Source: Springer Nature journal article supplement (https://www.springermedizin.de/resource/supplementary/12885_2012_3652_MOESM8_ESM.pdf/9463764)

Basal cell lines *PADI2-ERBB2* correlation  
( $\rho = -0.0495$ ,  $p = 0.0454$ )

Basal  
 $\rho = -0.556$   
 $p = 0.0276$

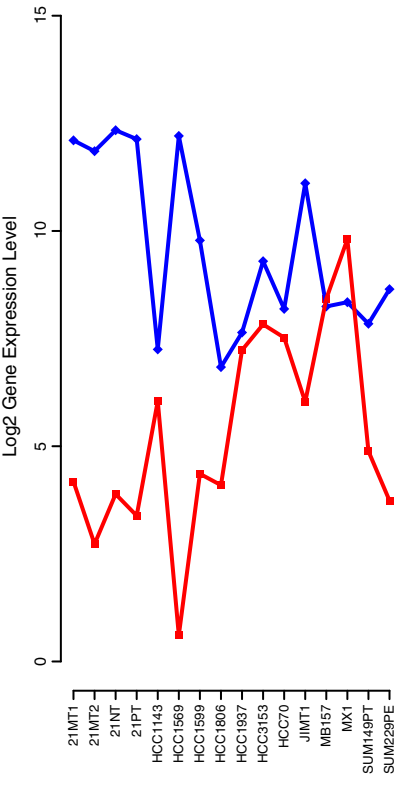

Basal-NM, Claudin-low, and Luminal cell lines *PADI2-ERBB2* correlation  
( $\rho = 0.828$ ,  $p = 2.2E-16$ )

Basal-NM  
 $\rho = 0.4$   
 $p = 0.517$

Claudin-low  
 $\rho = 0.371$   
 $p = 0.497$

Luminal  
 $\rho = 0.66$   
 $p = 0.000144$

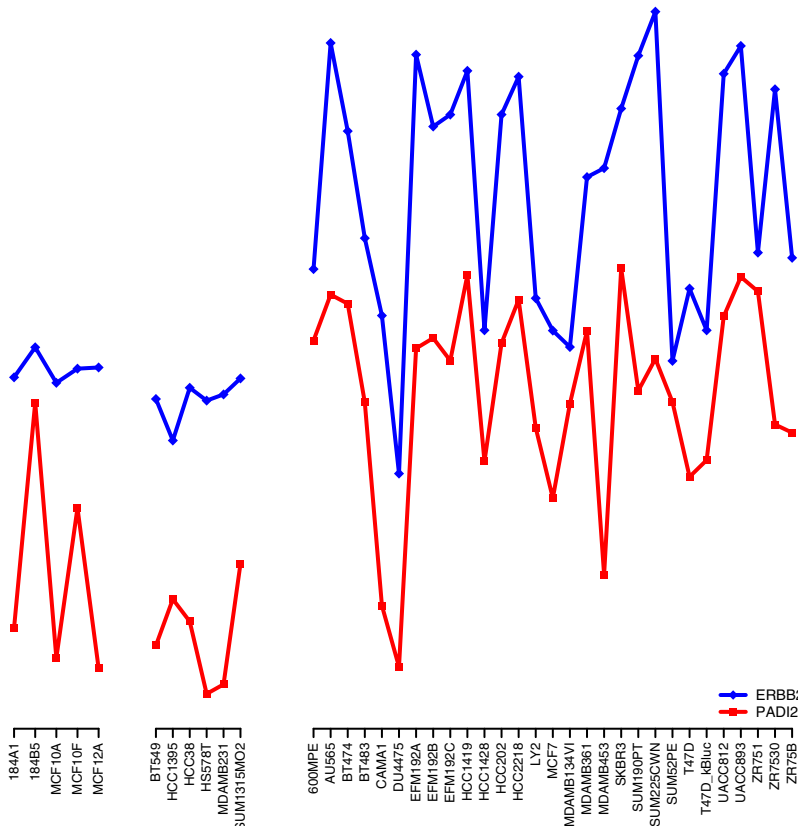

Supplement: MOESM8 [file 9463764]
